# Supplementary material
Source: PubMed Central journal article supplement (PMC3375982)
Supplement: supp_pp.112.193706_193706Supplemental_Figures_final.pdf [file supp_pp.112.193706_193706Supplemental_Figures_final.pdf]

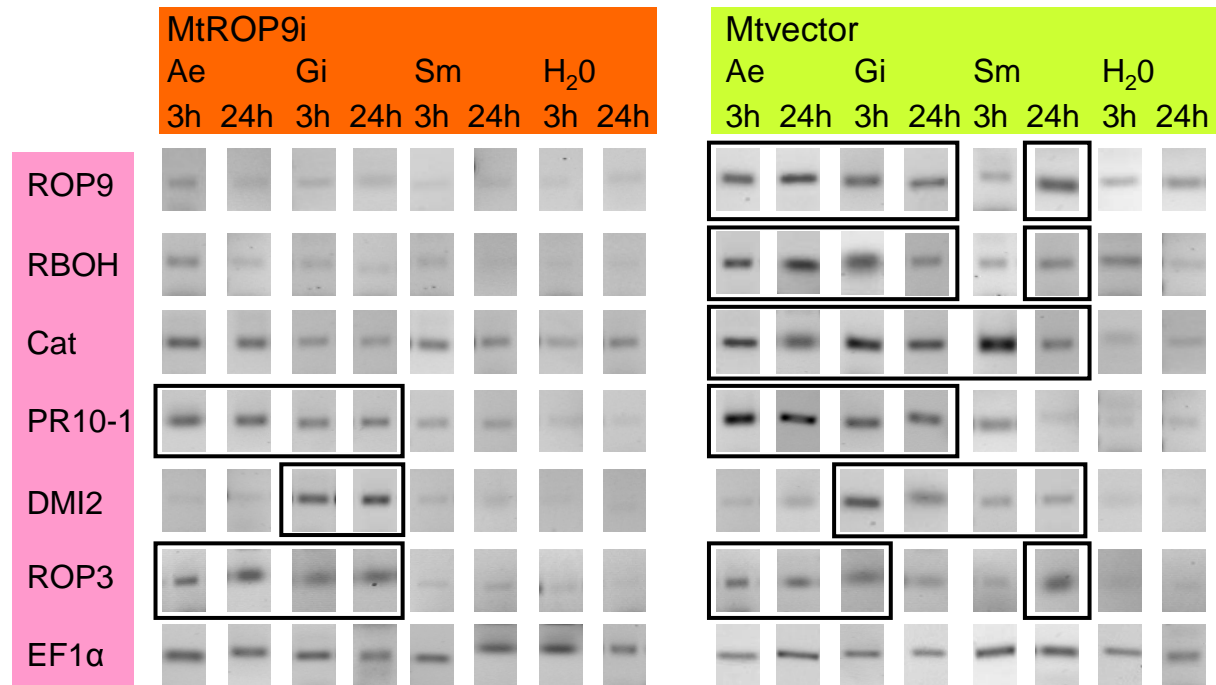

**Supplemental Figure S1. Expression of *MtROP9* and other related genes in *MtROP9i* and *Mtvector* transgenic roots after *A. euteiches* (Ae), *G. intraradices* (Gi) and *S. meliloti* (Sm) infection at 3 h and 24 h post inoculation. Representative bands of electrophoretically separated amplification products of RT-PCR. Increased expression relative to that in the water controls is marked with black boxes.**
